# Supplementary material
Source: Springer Nature journal article supplement (https://www.springermedizin.de/resource/supplementary/13256_2007_179_MOESM3_ESM.pdf/9645444)

DFOV 15.0cm  
BONE/+/I/

09 Mar 2006  
512

R  
3  
7

L  
7  
7

kV 120  
mA 150

Head  
1.250mm/10.63 0.531:1  
Tilt: 0.0  
0.6s /HE+ 15:07:12/01.94  
W:2000 L:400

P 53

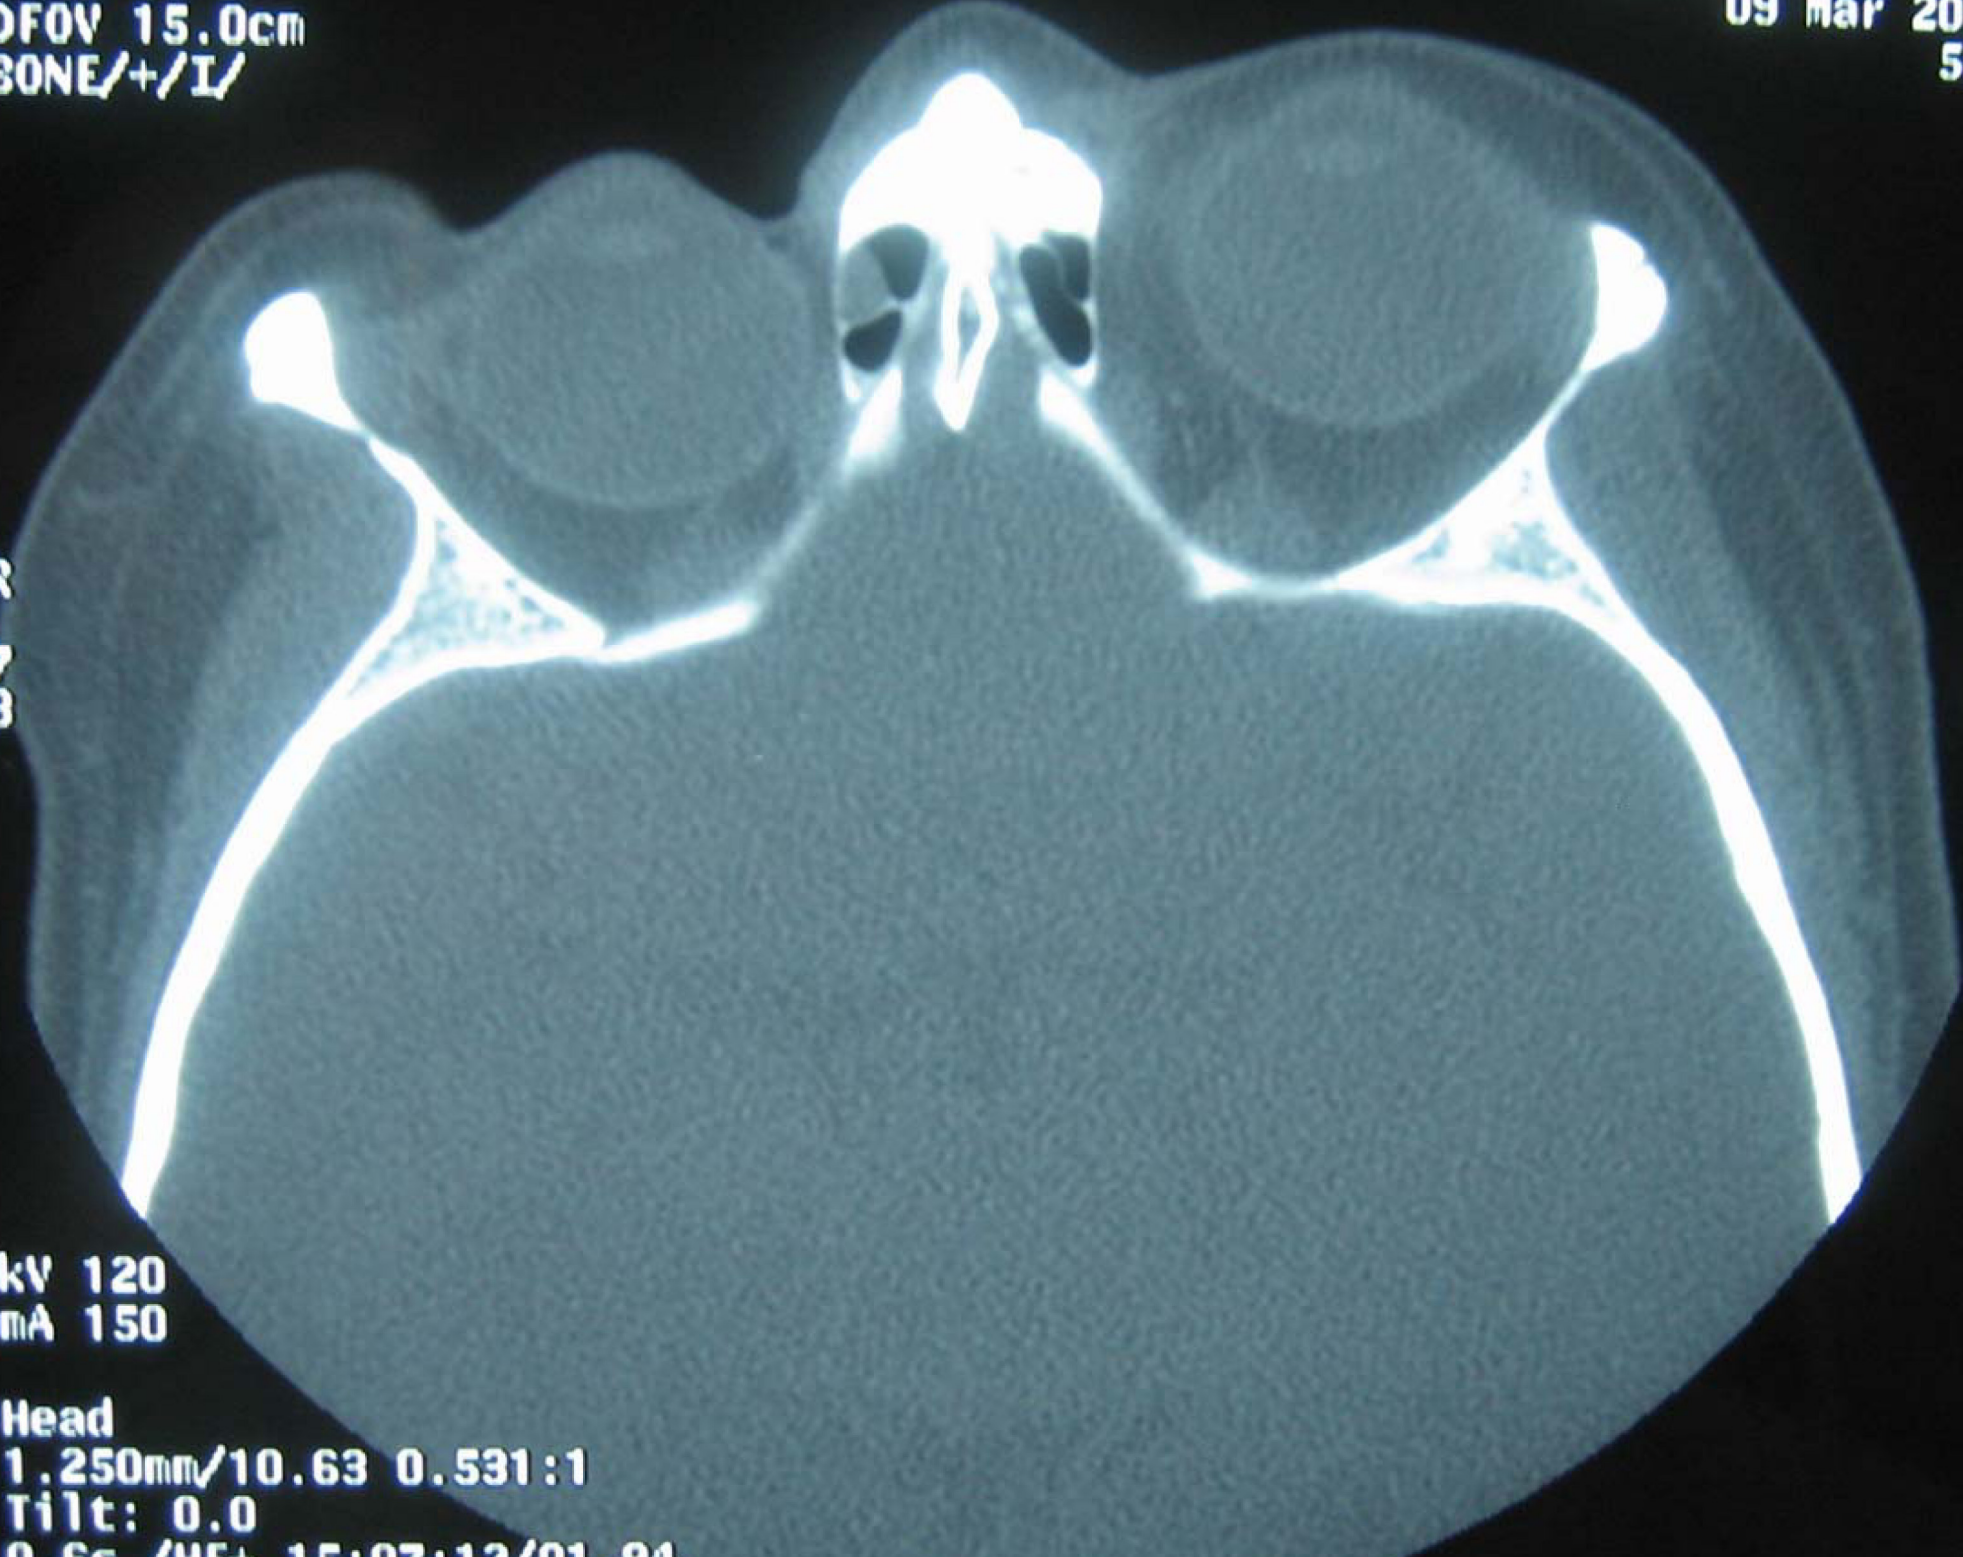

Supplement: MOESM3 [file 9645444]
